# Supplementary material for: Porous carbon-supported PtPdCu alloy heterostructures with a three-dimensional spatial network for efficient ethanol electro-oxidation
Source: Royal Society of Chemistry journal article supplement (doi:10.1039/d4nr05301j), 2025-01-01
Supplement: d4nr05301j1.pdf [file d4nr05301j1.pdf]

Electronic Supplementary Information

**Porous carbon-supported PtPdCu alloy heterostructure  
with three-dimensional spatial network for efficient  
ethanol eletro-oxidation**

Guanjun Chen<sup>a,\*</sup>, Yichu Lei<sup>a</sup>, Zheming Huang<sup>a</sup>, Tong Wang<sup>a</sup>, Tingwei Hu,<sup>b,\*</sup> Lan Sun<sup>c,\*</sup>,  
Yongpeng Qiao<sup>d</sup>

<sup>a</sup> *School of Materials Science and Engineering, Shaanxi University of Science and  
Technology, Xi'an, 710021, China*

<sup>b</sup> *School of Tropical Medicine, Hainan Medical University, Haikou, 571199, People's  
Republic of China*

<sup>c</sup> *China Aerodynamic Research and Development Center, Mianyang, 621000, China*

<sup>d</sup> *Xi'An Flit Heat Treatment Co. Ltd, Xi'an, 710075, China*

*\*Corresponding author:*

*sk-cgj@sust.edu.cn (G. J. Chen);*

*htingwei1236@mail.xjtu.edu (T. W. Hu);*

*sunlan716@outlook.com (L. Sun).*

**Fig. S1** Guanjun Chen *et al.*

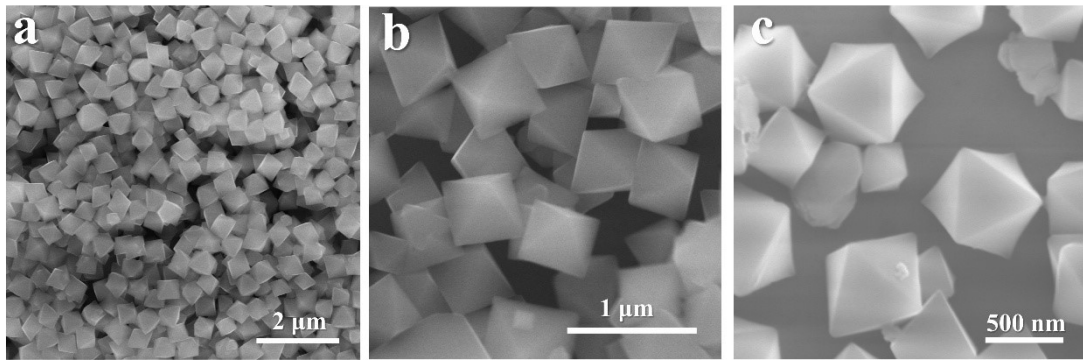

**Fig. S1** SEM image of Cu-BTC.

Fig. S2 Guanjun Chen *et al.*

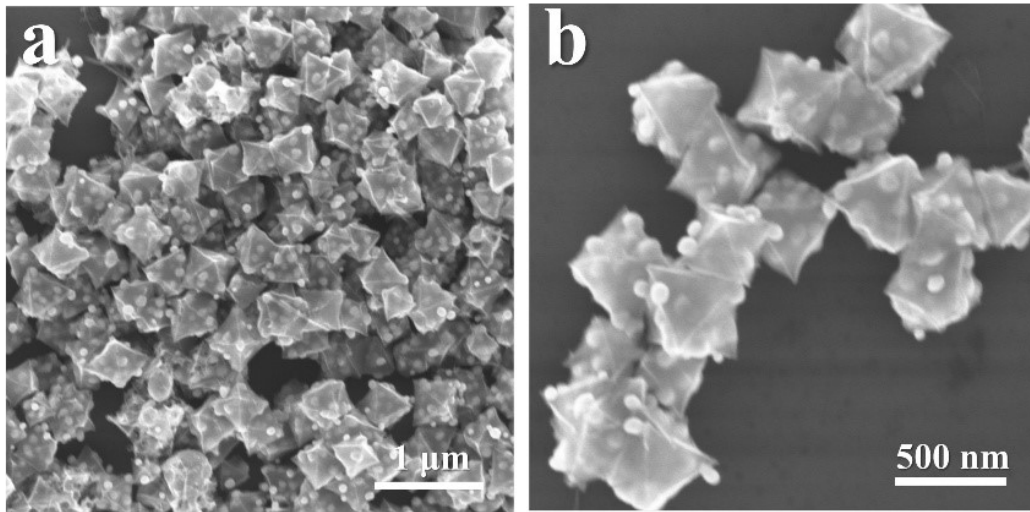

Fig. S2 SEM images of Cu/C.

Fig. S3 Guanjun Chen *et al.*

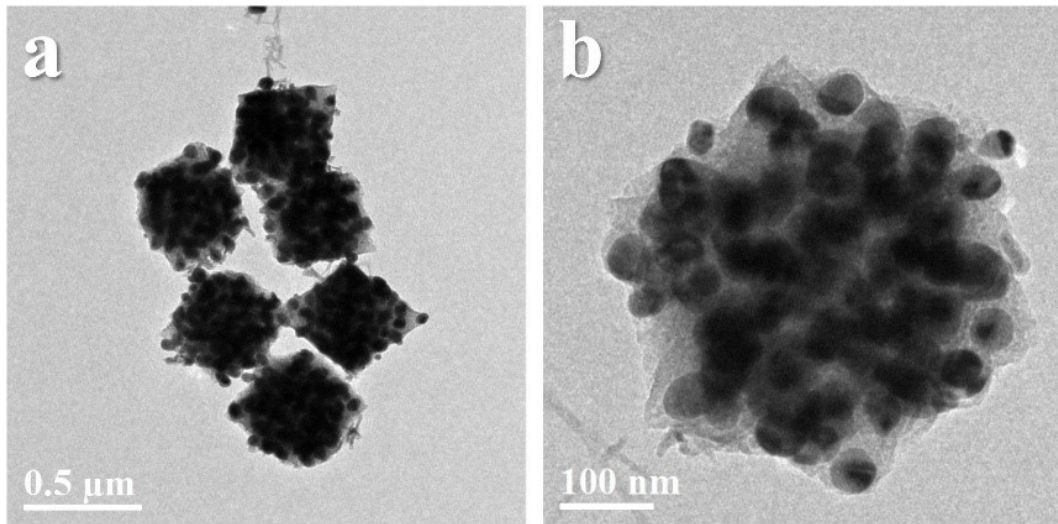

Fig. S3 TEM images of Cu/C.

Fig. S4 Guanjun Chen *et al.*

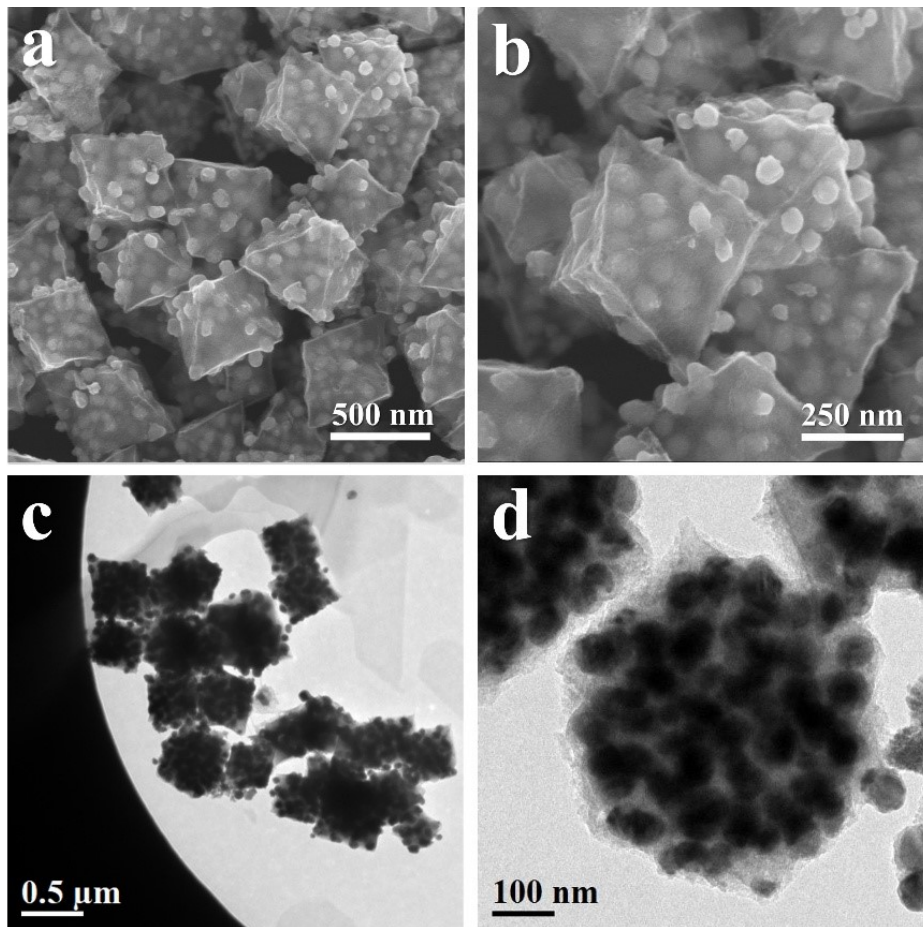

Fig. S4 (a-b) SEM images and (c-d) TEM images of Cu<sub>2</sub>O/C.

Fig. S5 Guanjun Chen *et al.*

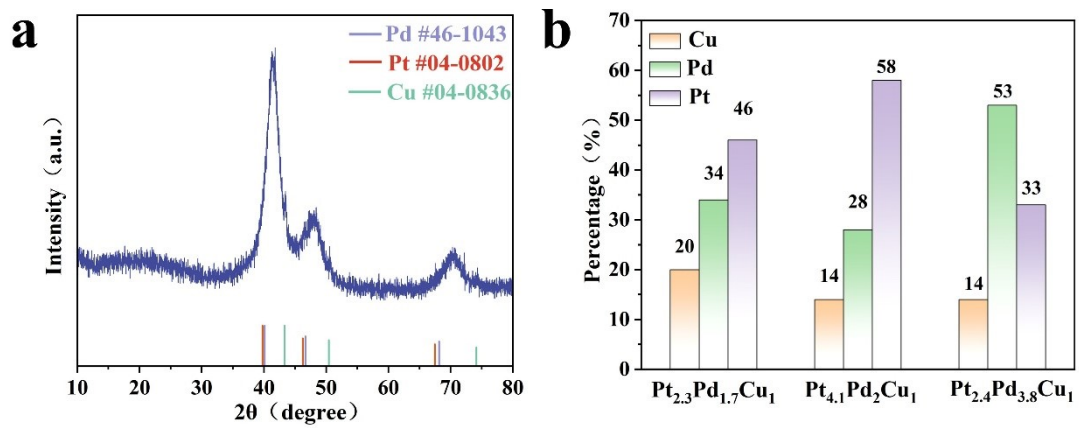

Fig. S5 (a) XRD pattern of Pt<sub>x</sub>Pd<sub>y</sub>Cu<sub>z</sub>/C. (b) The atomic fraction of Pt, Pd and Cu in the sample.

Fig. S6 Guanjun Chen *et al.*

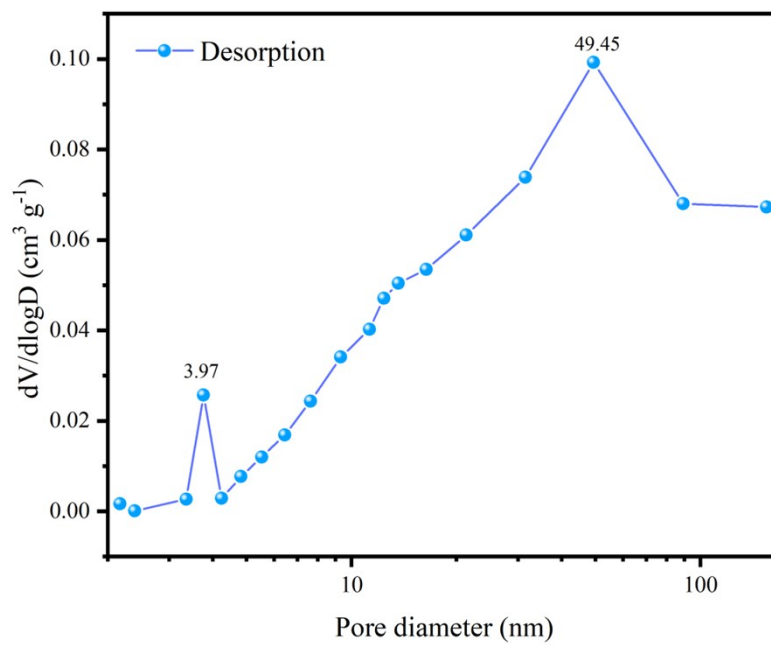

Fig. S6 Nitrogen adsorption and desorption isotherms of  $\text{Pt}_x\text{Pd}_y\text{Cu}_z/\text{C}$ .

Fig. S7 Guanjun Chen *et al.*

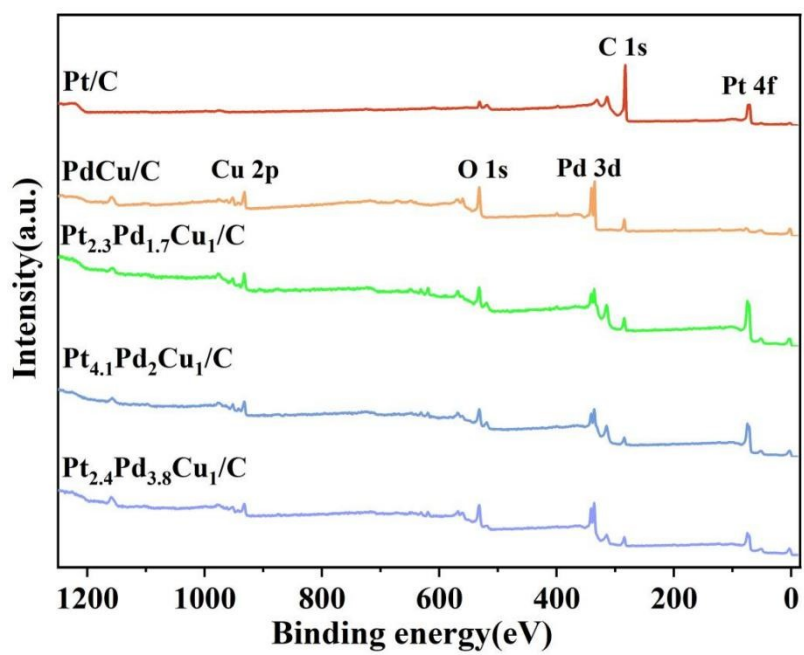

Fig. S7 (a-e) Full range XPS spectrum of Pt<sub>x</sub>Pd<sub>y</sub>Cu<sub>z</sub>/C, Pt/C and Pd/C.



Fig. S8 Guanjun Chen *et al.*

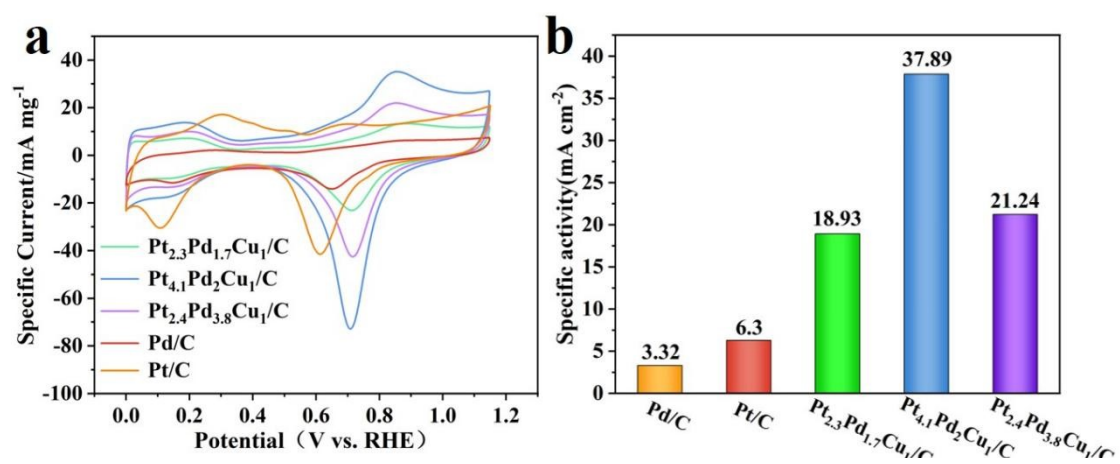

Fig. S8 (a) CV curves of Pt<sub>x</sub>Pd<sub>y</sub>Cu<sub>z</sub>/C, commercial Pt/C and Pd/C catalysts in 1 M KOH. (b) Specific activity of Pt<sub>x</sub>Pd<sub>y</sub>Cu<sub>z</sub>/C, commercial Pt/C and Pd/C catalysts.

Fig. S9 Guanjun Chen *et al.*

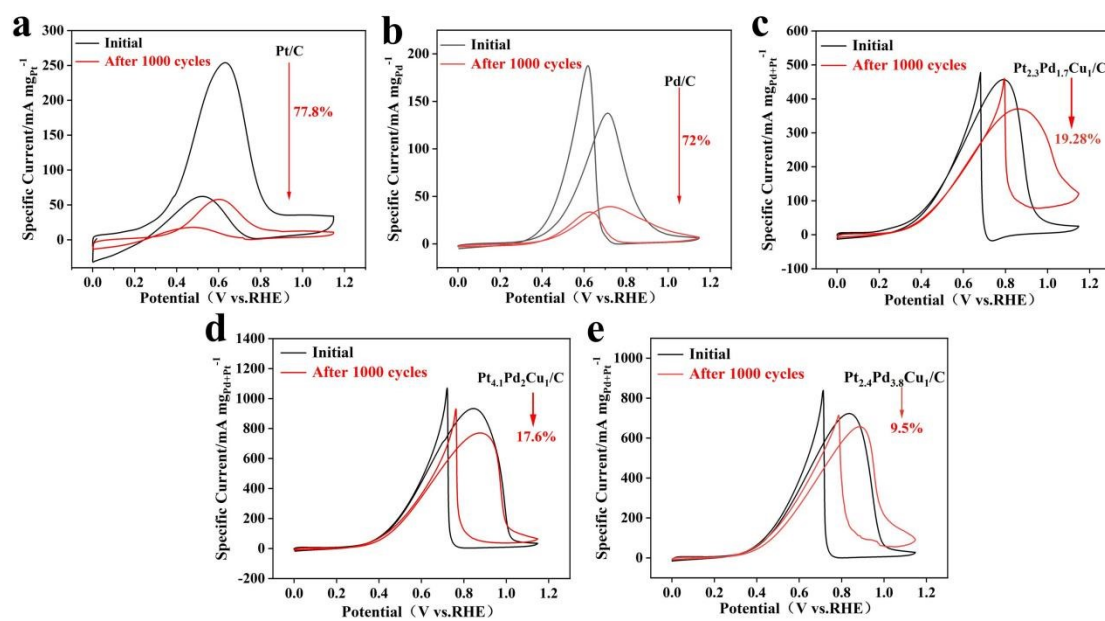

Fig. S9 (a-e) CV curves of Pt/C, Pd/C and Pt<sub>x</sub>Pd<sub>y</sub>Cu<sub>z</sub>/C catalysts before and after 1000 cycles in 1M KOH with 1 M ethanol solution.

**Fig. S10** Guanjun Chen *et al.*

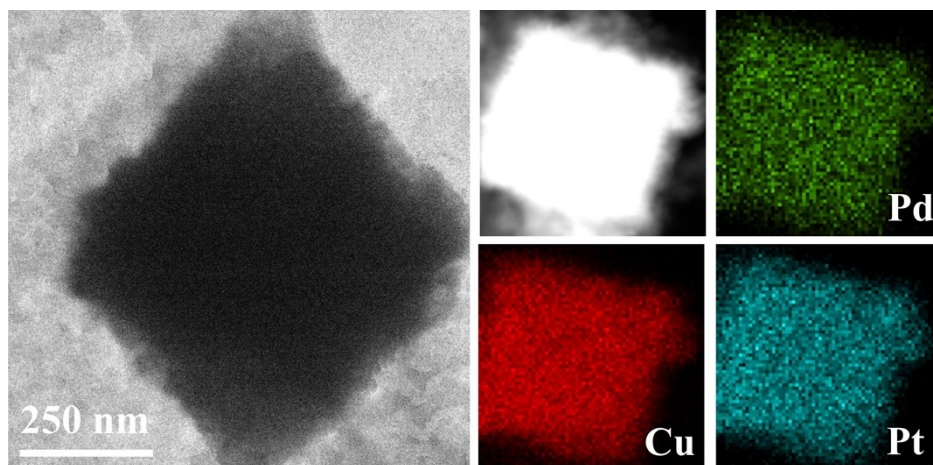

**Fig. S10** TEM image and corresponding EDS elemental mapping analysis of PtxPdyCuz/C after electrochemical stability testing.

Fig. S11 Guanjun Chen *et al.*

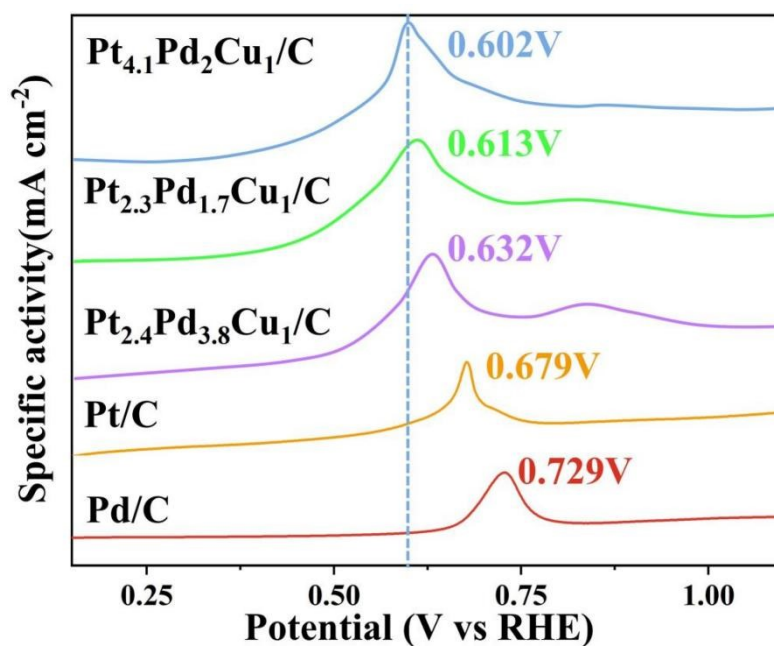

Fig. S11 CO stripping curves of Pt/C, Pd/C and Pt<sub>x</sub>Pd<sub>y</sub>Cu<sub>z</sub>/C catalysts in 1 M KOH.

**Table S1** Guanjun Chen *et al.***Table S1** The onset and peak potentials of Pt/C, Pd/C and Pt<sub>x</sub>Pd<sub>y</sub>Cu<sub>z</sub>/C catalysts in EOR.

|                                                         | <b>Onset Potential (V)</b> | <b>Peak Potential (V)</b> |
|---------------------------------------------------------|----------------------------|---------------------------|
| <b>Pt<sub>2.3</sub>Pd<sub>1.7</sub>Cu<sub>1</sub>/C</b> | 0.442                      | 0.794                     |
| <b>Pt<sub>4.1</sub>Pd<sub>2</sub>Cu<sub>1</sub>/C</b>   | 0.428                      | 0.846                     |
| <b>Pt<sub>2.4</sub>Pd<sub>3.8</sub>Cu<sub>1</sub>/C</b> | 0.451                      | 0.834                     |
| <b>Pt/C</b>                                             | 0.488                      | 0.638                     |
| <b>Pd/C</b>                                             | 0.634                      | 0.714                     |
